# Supplementary material
Source: PubMed Central journal article supplement (PMC3070817)
Supplement: NIHMS270353-supplement-1_si_001.pdf [file NIHMS270353-supplement-1_si_001.pdf]

## **Supplementary Figures**

### **Multiplexed PET Probes for Imaging Breast Cancer Early Response to VEGF<sub>121</sub>/rGel Treatment**

Min Yang<sup>1,2†</sup>, Haokao Gao<sup>2,3†</sup>, Xilin Sun<sup>2</sup>, Yongjun Yan<sup>2</sup>, Wendy Zhang<sup>4</sup>, Khalid Mohamedali<sup>4</sup>, Michael G. Rosenblum<sup>4</sup>, Qimeng Quan<sup>2</sup>, Gang Niu<sup>2,\*</sup>, Xiaoyuan Chen<sup>2,\*</sup>

<sup>1</sup> *Key Laboratory of Nuclear Medicine, Ministry of Health, Jiangsu Key Laboratory of Molecular Nuclear Medicine, Jiangsu Institute of Nuclear Medicine. Wuxi, Jiangsu 214063, China*

<sup>2</sup> *Laboratory of Molecular Imaging and Nanomedicine (LOMIN), National Institute of Biomedical Imaging and Bioengineering (NIBIB), National Institutes of Health (NIH), Bethesda, MD 20892-2281, USA*

<sup>3</sup> *Department of Cardiology, Xijing Hospital, the Fourth Military Medical University, Xian 710032, China*

<sup>4</sup> *Department of Experimental Therapeutics, UT MD Anderson Cancer Center, Houston, TX 77030, USA*

† These authors contributed equally in this work.

**\* Correspondence:**

Gang Niu, [niug@mail.nih.gov](mailto:niug@mail.nih.gov); Xiaoyuan Chen, [shawn.chen@nih.gov](mailto:shawn.chen@nih.gov).

**Suppl. Figure 1.** (A) & (B) Immunofluorescence staining of GLUT-1 from two groups (A. Control; B, VEGF<sub>121</sub>/rGel); (C) & (D) Immunofluorescence staining of F4/80 from two groups (C, Control; B, VEGF<sub>121</sub>/rGel); (E) GLUT-1 integrated optical density is plotted in the histogram. (F) F4/80 integrated optical density is plotted in the histogram. Three samples were used from each group, and results were confirmed with a duplicate experiment.

**Suppl. Figure 2.** Proliferation of tumor cells in MDA-MB-435 tumors after VEGF<sub>121</sub>/rGel treatment. (A) & (B) Tumor cell proliferation as assessed by Ki-67 immunofluorescence staining (A. Control; B, VEGF<sub>121</sub>/rGel); (C) Ki67 positive cells were counted and Ki-67 staining index (SI) was calculated by plotting Ki-67 positive cell number against total cell number. A significant decrease of Ki67 SI was observed at day 3 after VEGF<sub>121</sub>/rGel treatment, compared with control (\*\* p < 0.01). Three samples were used from each group, and results were confirmed with a duplicate experiment.

**Suppl. Figure 3.** (A) & (B) Immunofluorescence staining of human integrin  $\alpha v \beta 3$  for MDA-MB-435 tumor tissues (A. Control; B, VEGF<sub>121</sub>/rGel). (C) Integrated optical density (IOD) of human integrin  $\alpha v \beta 3$  is plotted in the histogram. Three samples were used from each group, and results were confirmed with a duplicate experiment.

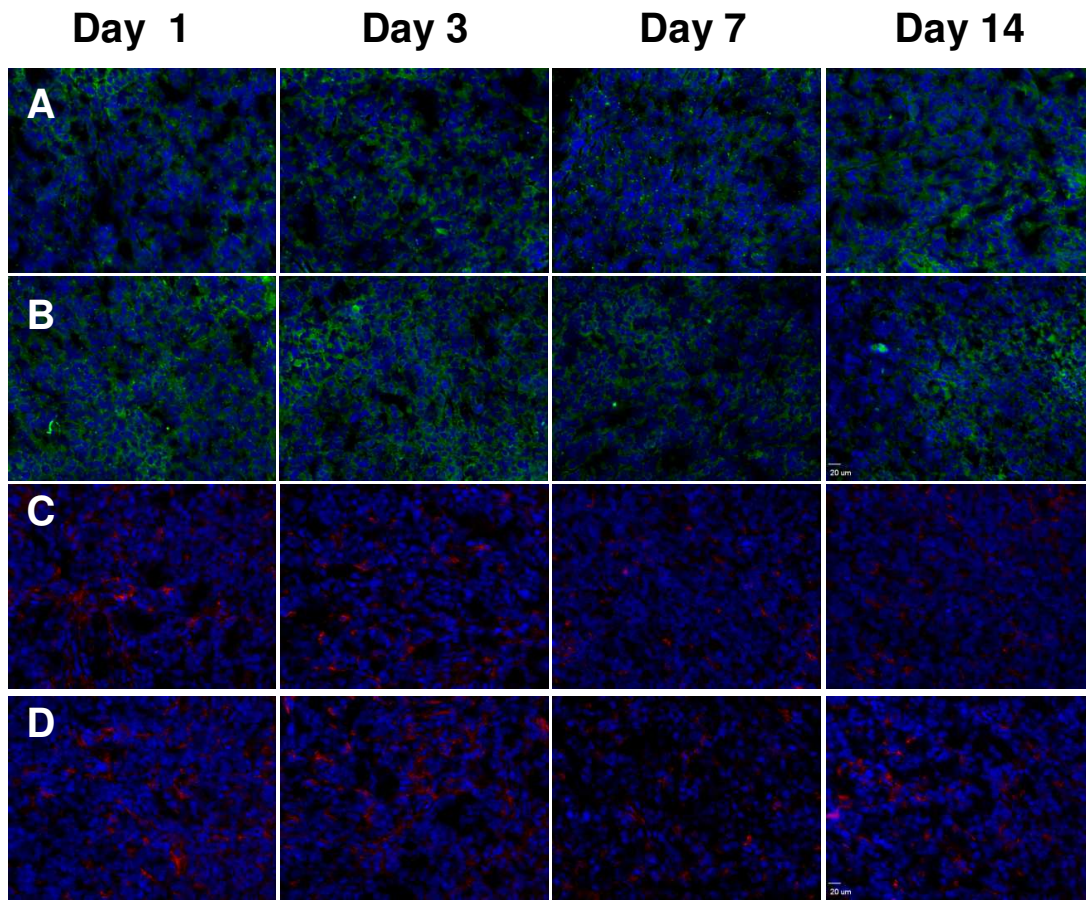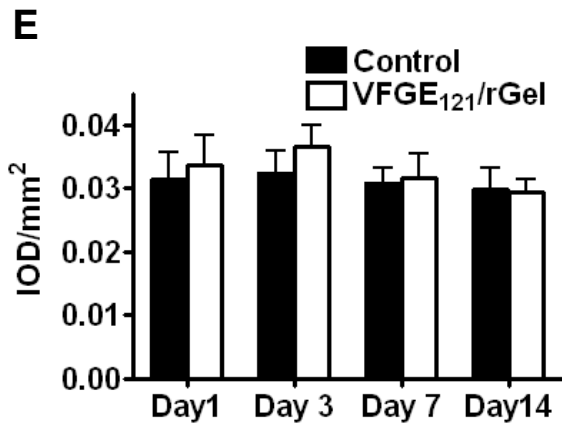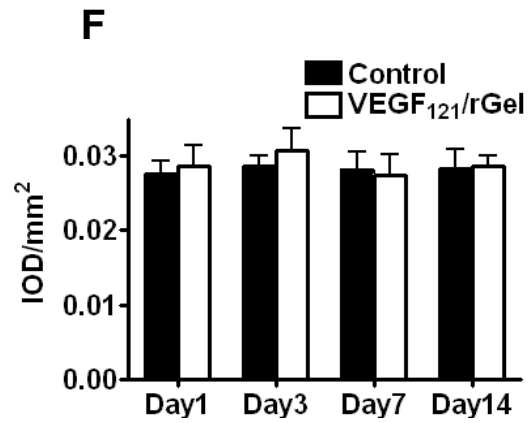

Suppl. Figure 1

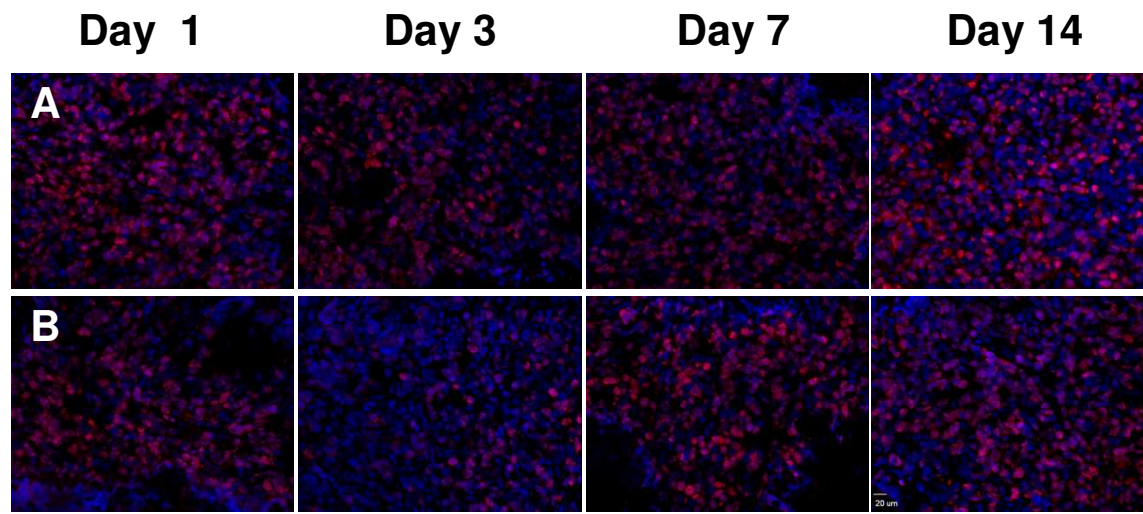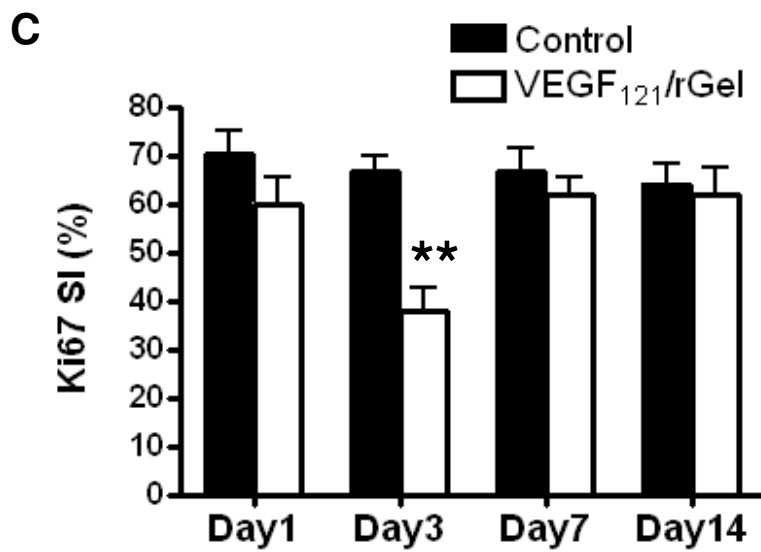

Suppl. Figure 2

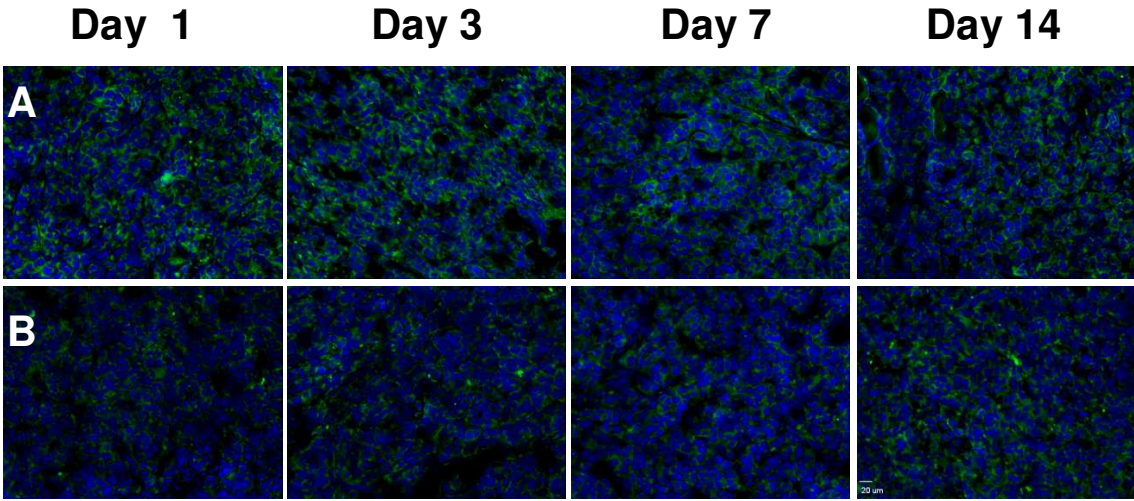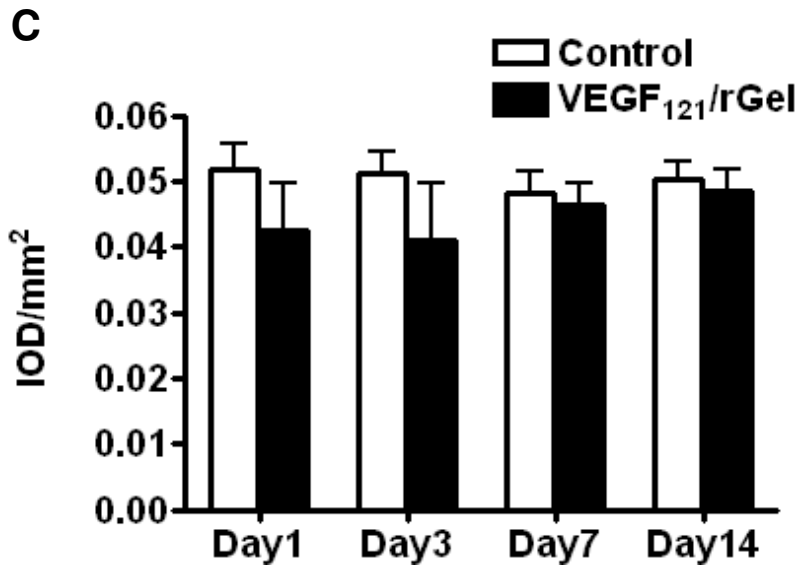

Suppl. Figure 3
